# Supplementary material
Source: PubMed Central journal article supplement (PMC4271204)

**Systemic blockade of sialylation in mice with a global inhibitor of sialyltransferases\***

Matthew S. Macauley\*\*<sup>1</sup>, Britni M. Arlian\*\*<sup>1</sup>, Cory D. Rillahan<sup>1,2</sup>, Poh-Choo Pang<sup>3</sup>, Nikki Bortell<sup>4</sup>, Maria Cecilia G. Marcondes<sup>4</sup>, Stuart M. Haslam<sup>3</sup>, Anne Dell<sup>3</sup>, and James C. Paulson<sup>1</sup>

<sup>1</sup>Departments of Cell and Molecular Biology, Chemical Physiology, and Immunology and Microbial Science  
The Scripps Research Institute, La Jolla, CA, 92037, USA.

<sup>2</sup>Division of Cancer Biology and Genetics  
Memorial Sloan-Kettering Cancer Center, New York, NY, 10065, USA.

<sup>3</sup>Department of Life Sciences, Faculty of Natural Sciences  
Imperial College London, London, SW7 2AZ, UK.

<sup>4</sup>Department of Molecular and Cellular Neuroscience  
The Scripps Research Institute, La Jolla, CA, 92037, USA.

\*\*Contributed equally to this work

\*Running title: *In vivo use of a global sialyltransferase inhibitor*

To whom correspondence should be addressed: James C. Paulson, <sup>1</sup>Departments of Cell and Molecular Biology, Chemical Physiology, and Immunology and Microbial Science, The Scripps Research Institute, 10550 N. Torrey Pines Rd., La Jolla, CA, USA, Tel.: (858) 784-9634; Fax (858) 784-9690; E-mail: [jpaulson@scripps.edu](mailto:jpaulson@scripps.edu)

## **SUPPLEMENTAL FIGURE LEGENDS**

**FIGURE S1.** MALDI-TOF mass spectra of liver *N*-glycans from mice treated with 3F-NeuAc. Regions from the MALDI-MS spectra shown in Figure 4A are expanded for clarity. The *N*-glycans were released by PNGase F and permethylated. Data were acquired in the positive ion mode to observe  $[M+Na]^+$  molecular ions. Structures shown outside a bracket have not had their antenna location unequivocally defined. Data are representative of three replicates for each condition.

**FIGURE S2.** Mass spectra of spleen *N*-glycans from mice treated with 3F-NeuAc. Regions from the MALDI-MS spectra shown in Figure 4B are expanded for clarity. The *N*-glycans were released by PNGase F and permethylated. Data were acquired in the positive ion mode to observe  $[M+Na]^+$  molecular ions. Structures shown outside a bracket have not had their antenna location unequivocally defined. Data are representative of three replicates for each condition.

**FIGURE S3.** Partial mass spectra of testis *N*-glycans from mice treated with 3F-NeuAc. Only signals that underwent major changes are annotated in these spectra. The *N*-glycans were released by PNGase F and permethylated. Data were acquired in the positive ion mode to observe  $[M+Na]^+$  molecular ions. Structures shown outside a bracket have not had their antenna location unequivocally defined. Data are representative of three replicates for each condition.

**FIGURE S4.** Mass spectra of kidney *N*-glycans and *O*-glycans from mice treated with 3F-NeuAc. (A-H) The *N*-glycans were released by PNGase F and permethylated. (I-J) The *O*-glycans were released by reductive elimination and permethylated. All data were acquired in the positive ion mode to observe  $[M+Na]^+$  molecular ions. Structures shown outside a bracket have not had their antenna location unequivocally defined. Peaks which are labeled with an "x" are due to known contaminants. Data are representative of three replicates for each condition.

# Figure S1

## Liver

Key: ◀ Fucose ● Mannose ● Galactose ■ N-acetylglucosamine ◇ N-glycolylneuraminic acid ◆ N-acetylneuraminic acid

### A m/z 1000-1500

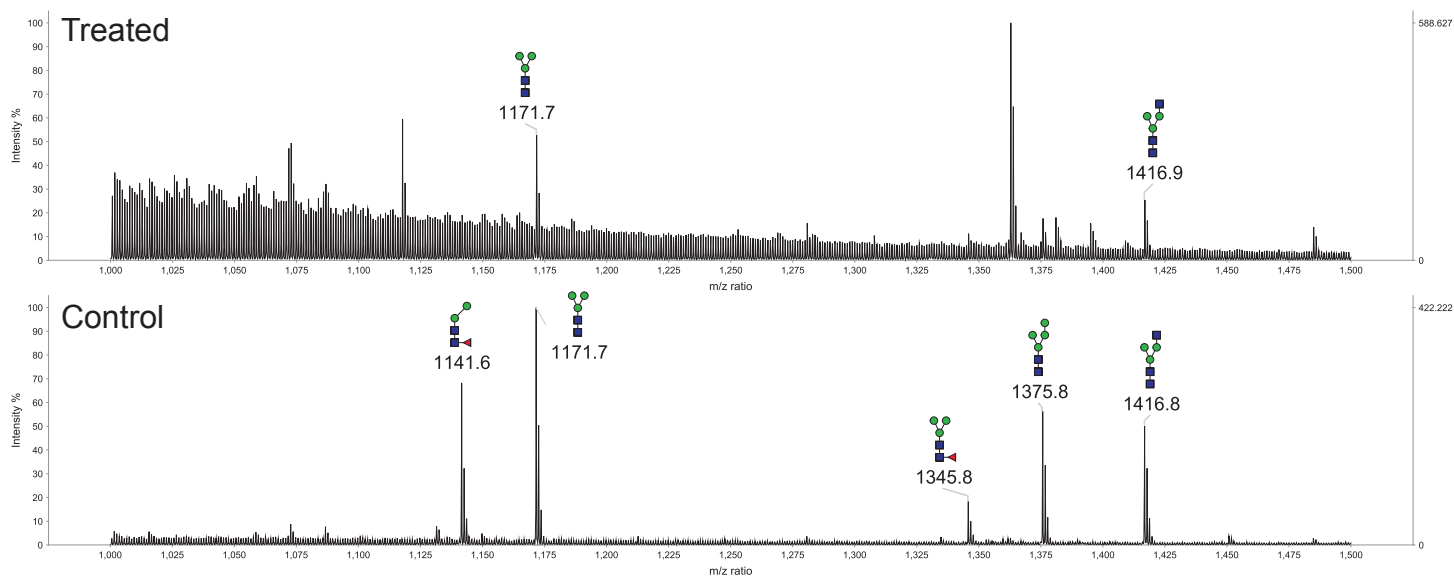

### B m/z 1500-2000

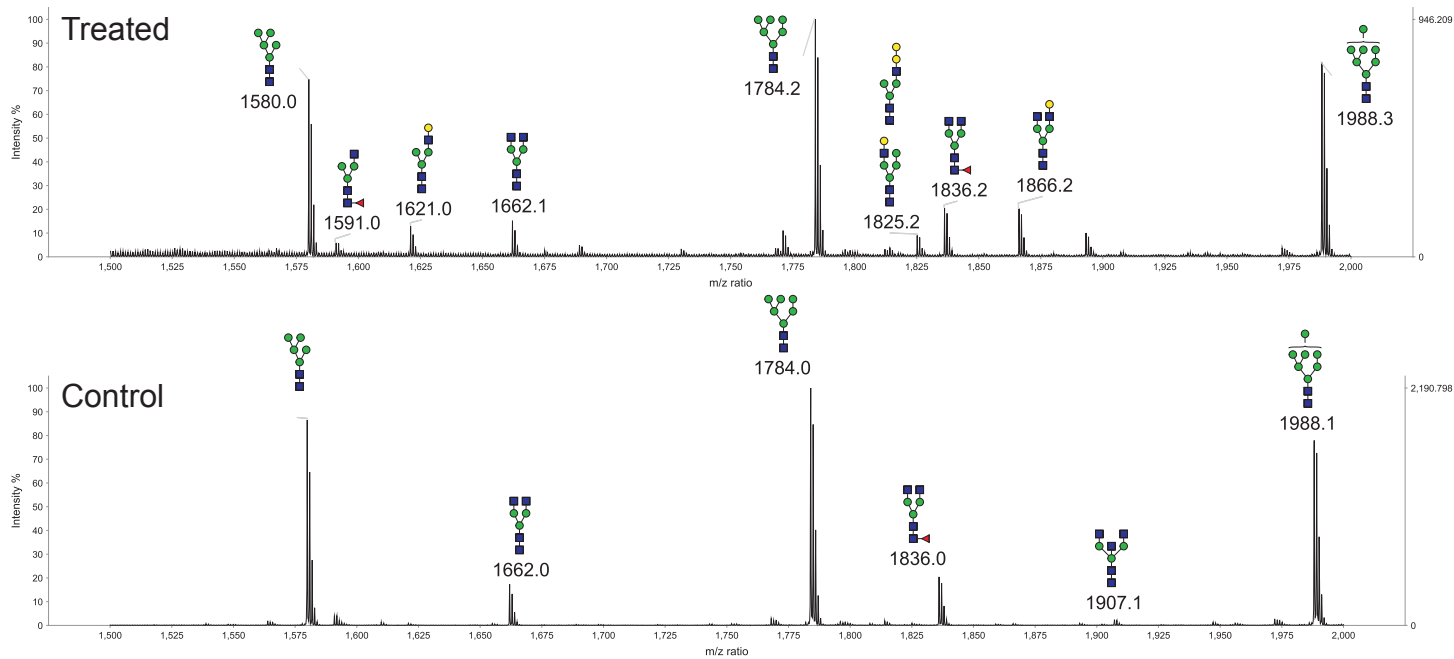

### C m/z 2000-2500

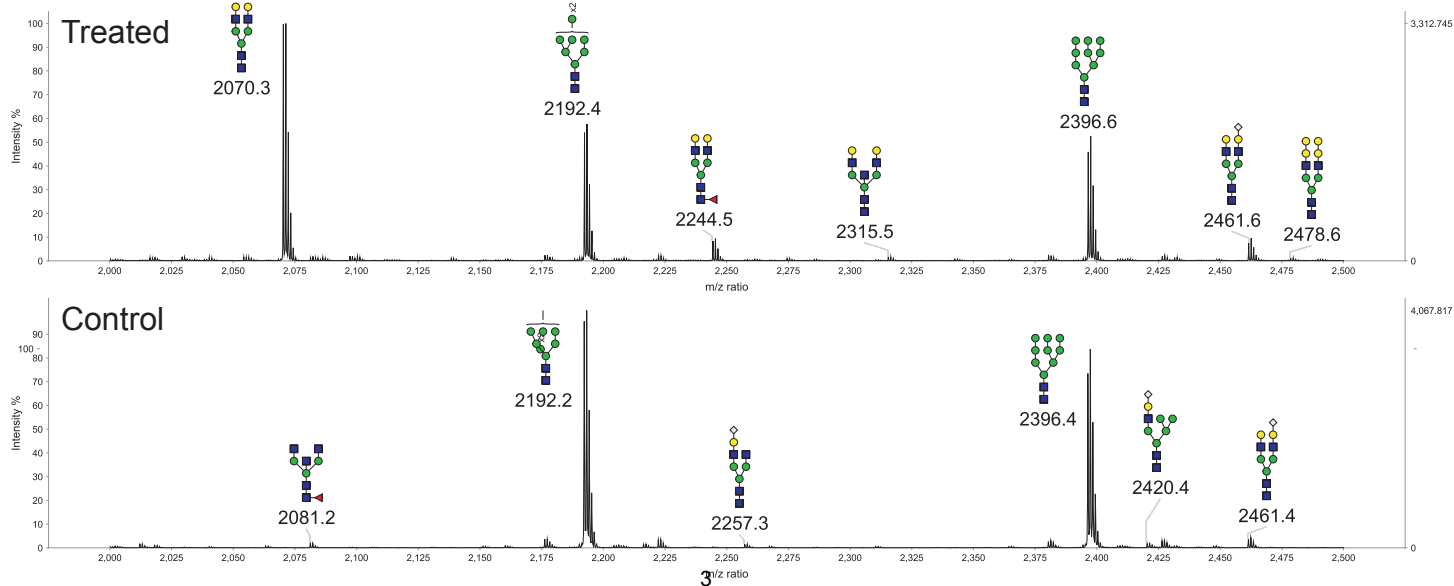

Figure S1 - continued

D *m/z* 2500-3000

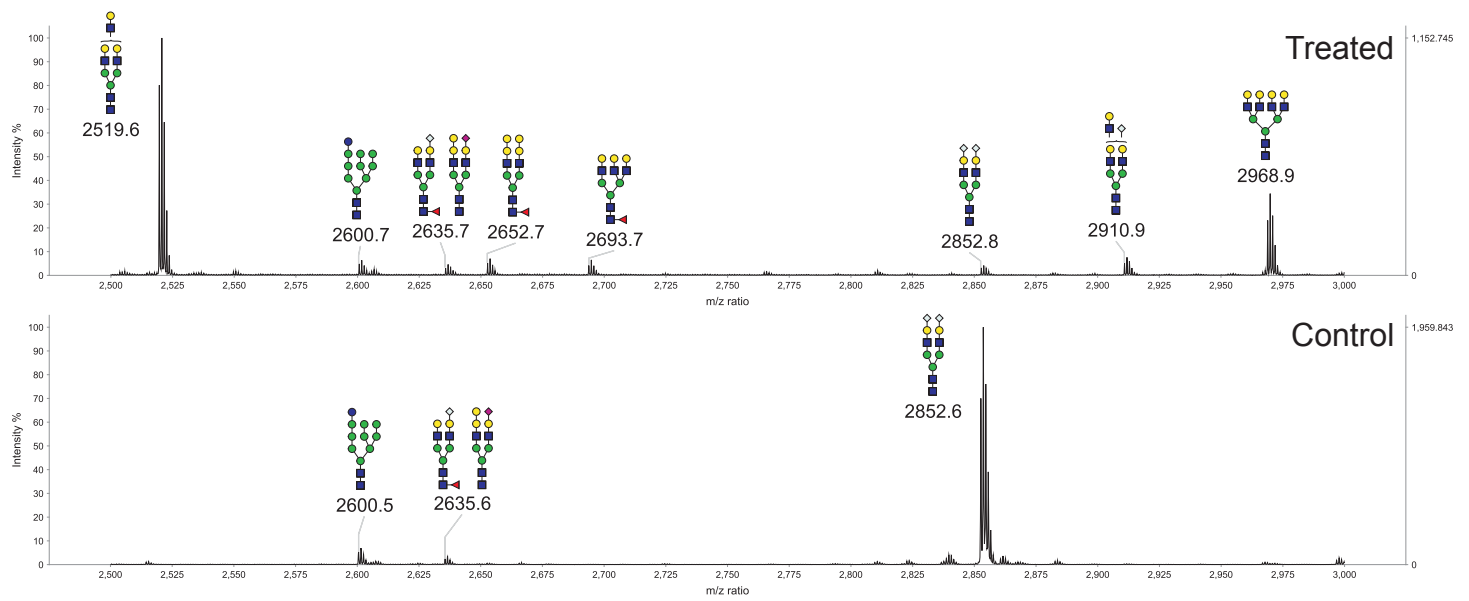

E *m/z* 3000-3500

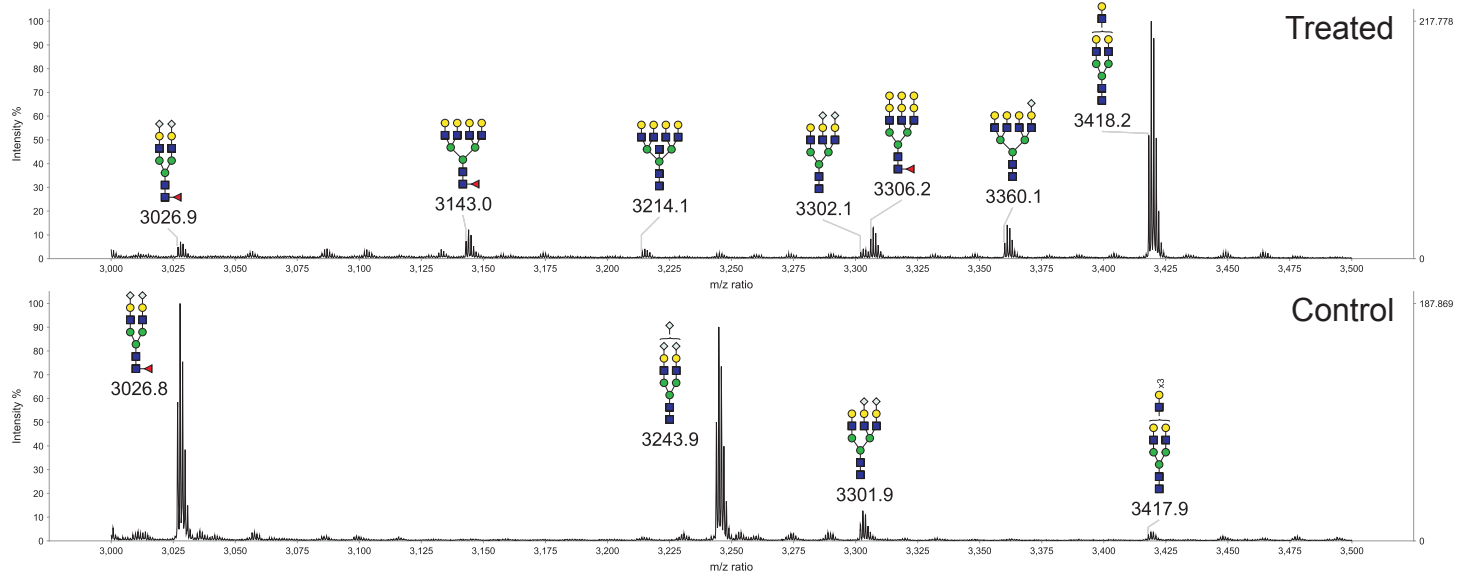

F *m/z* 3500-4000

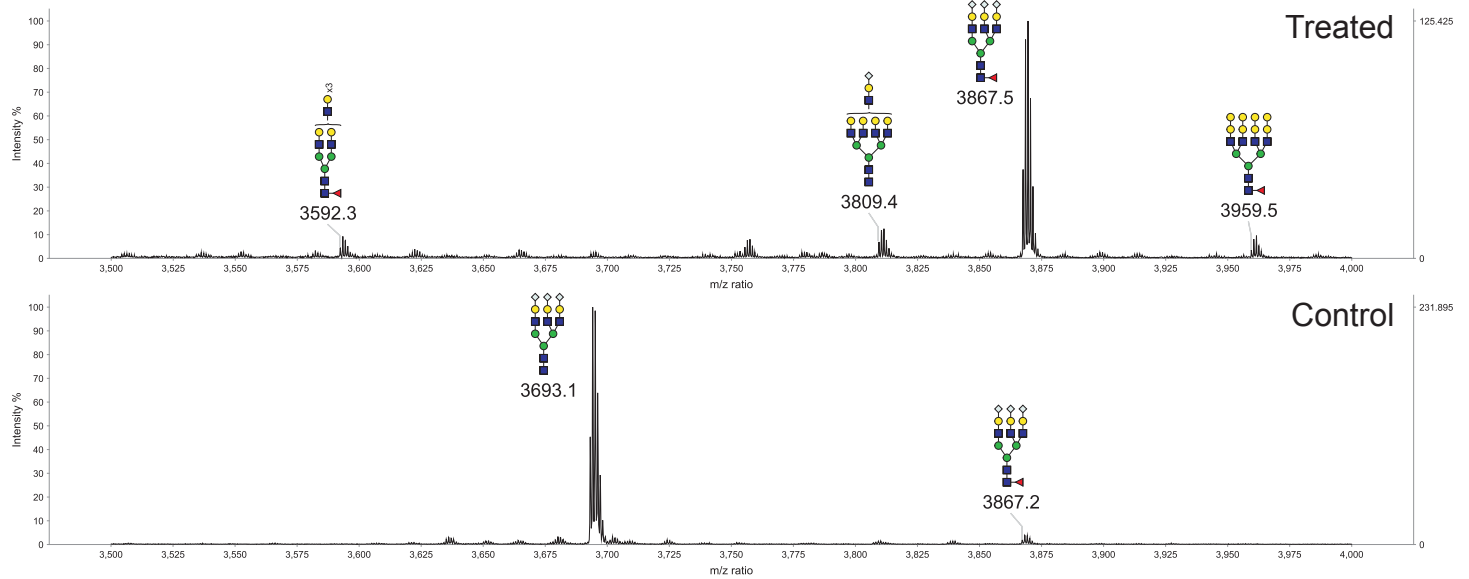

Figure S1 - continued

G *m/z* 4000-5000

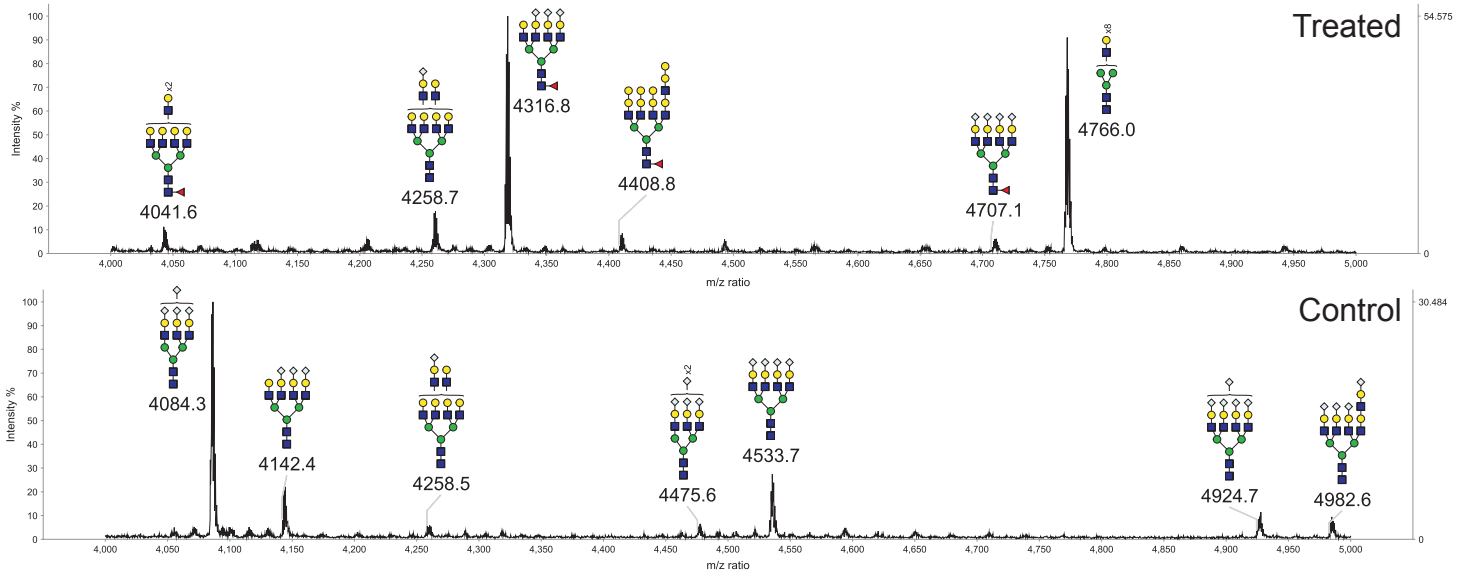

H *m/z* 5000-6000

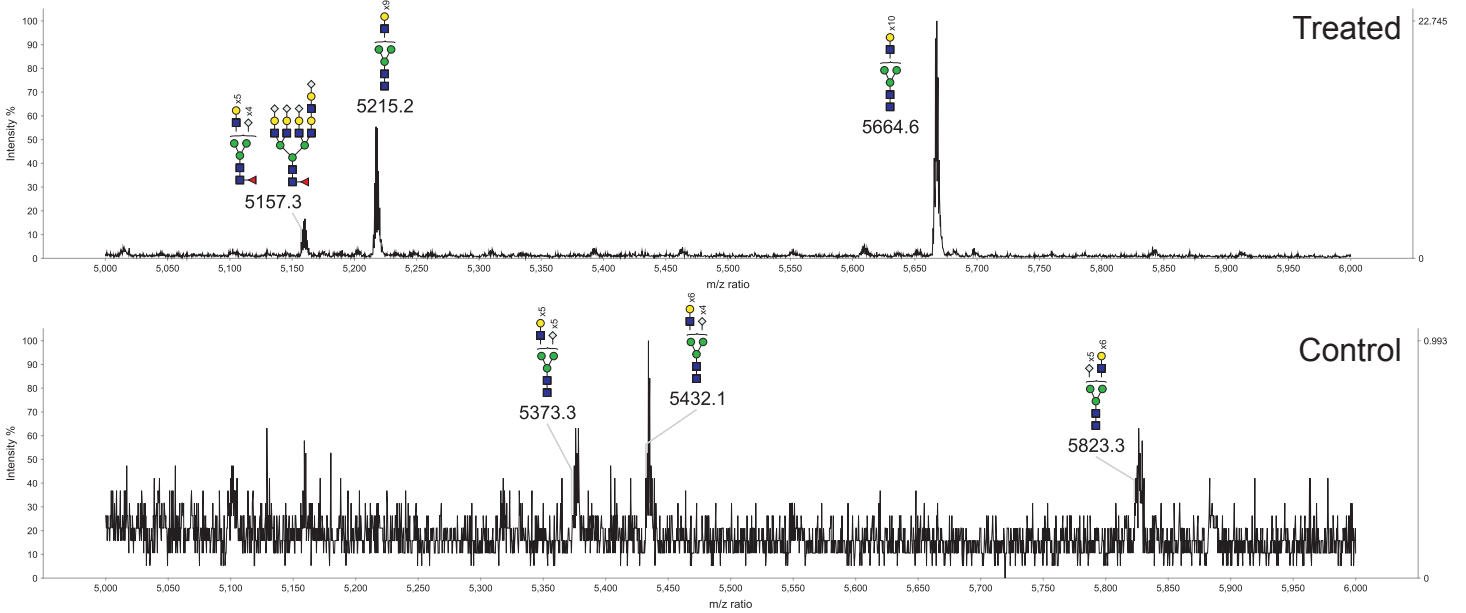

I *m/z* 6000-7000

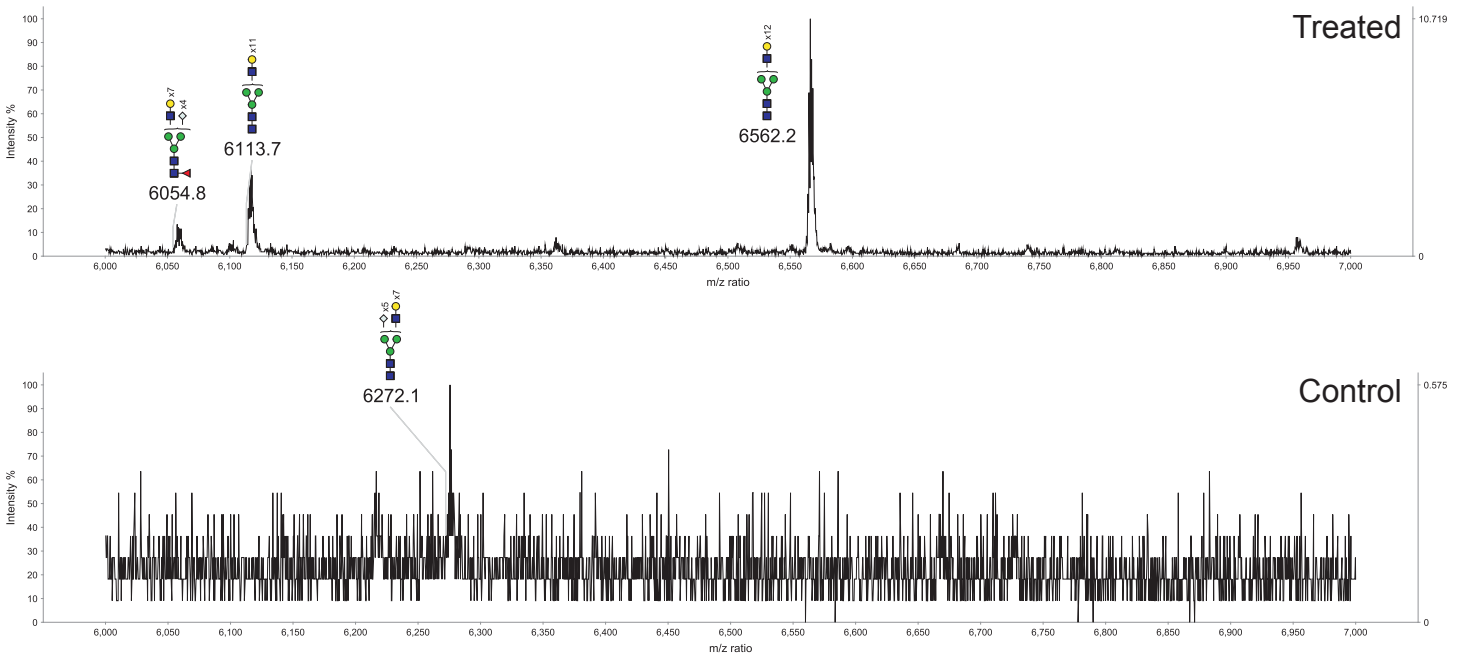

# Figure S2

## Spleen

Key: ◀ Fucose ● Mannose ● Galactose ■ N-acetylglucosamine ◇ N-glycolylneuraminic acid ◆ N-acetylneuraminic acid

### A m/z 1000-1500

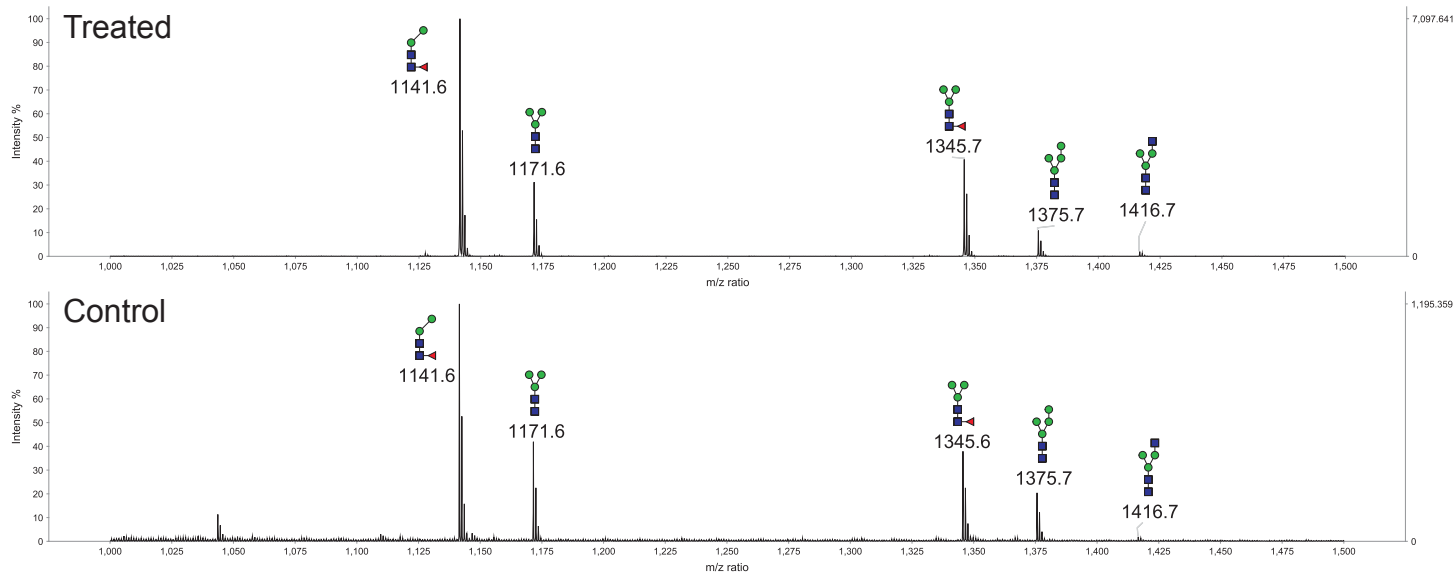

### B m/z 1500-2000

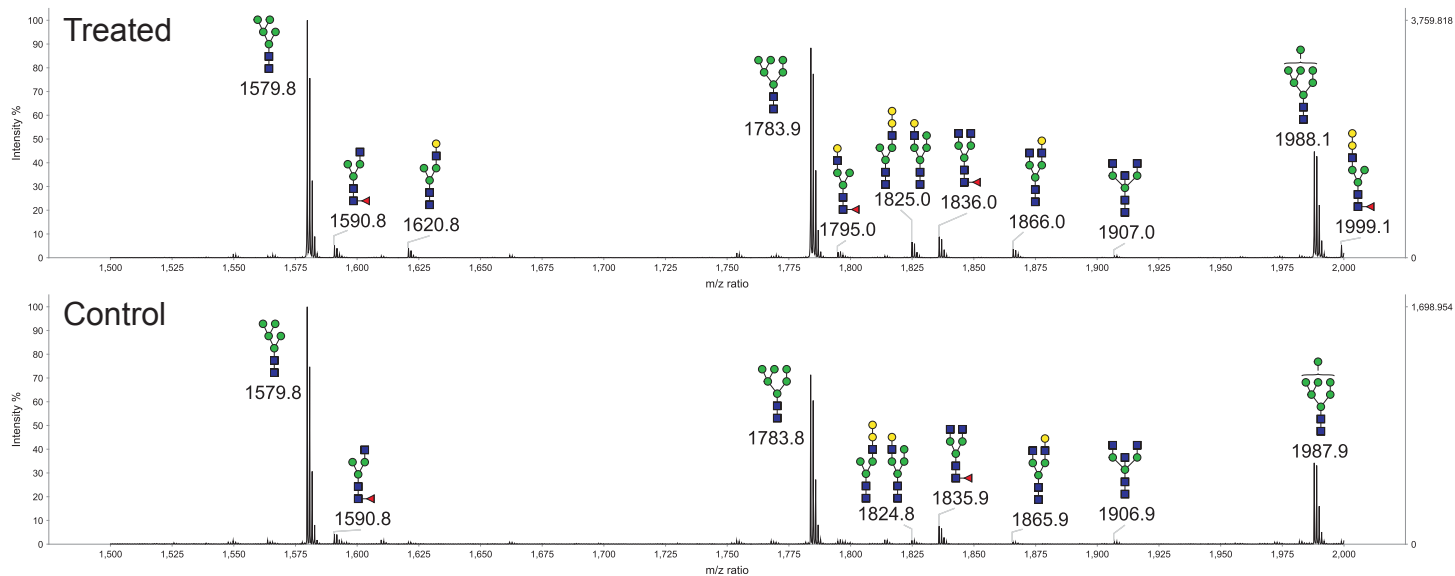

### C m/z 2000-2500

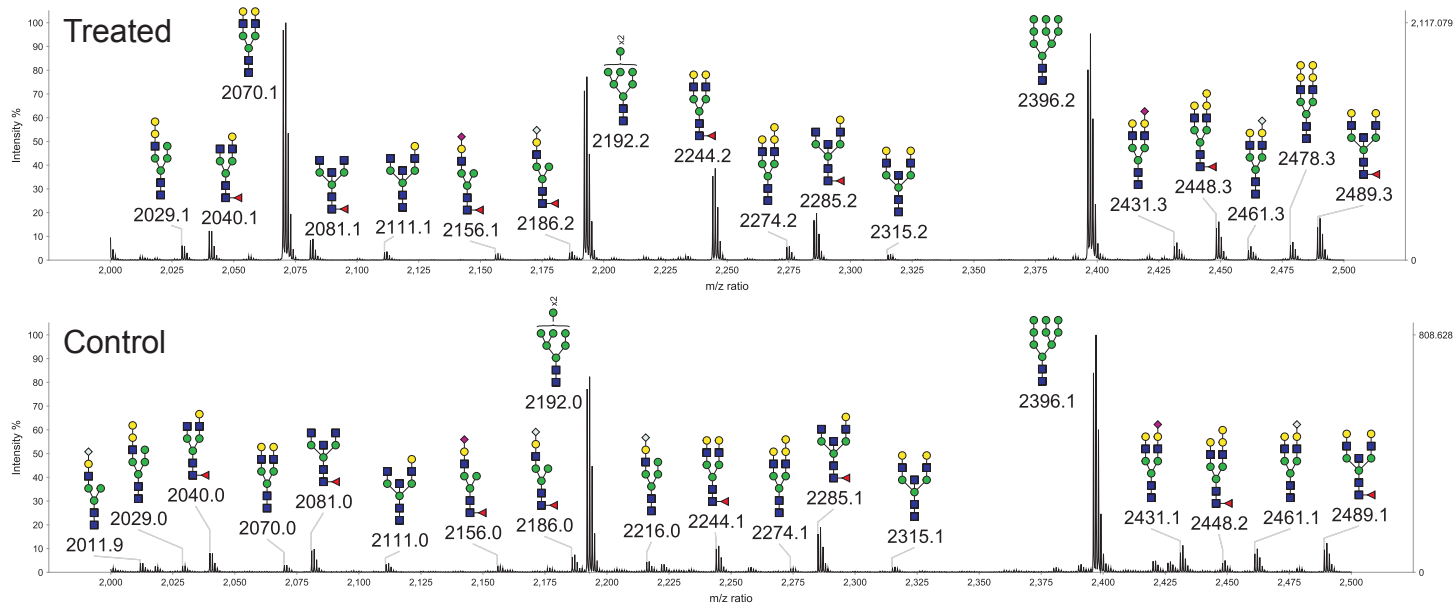

Figure S2 - continued

D  $m/z$  2500-3000

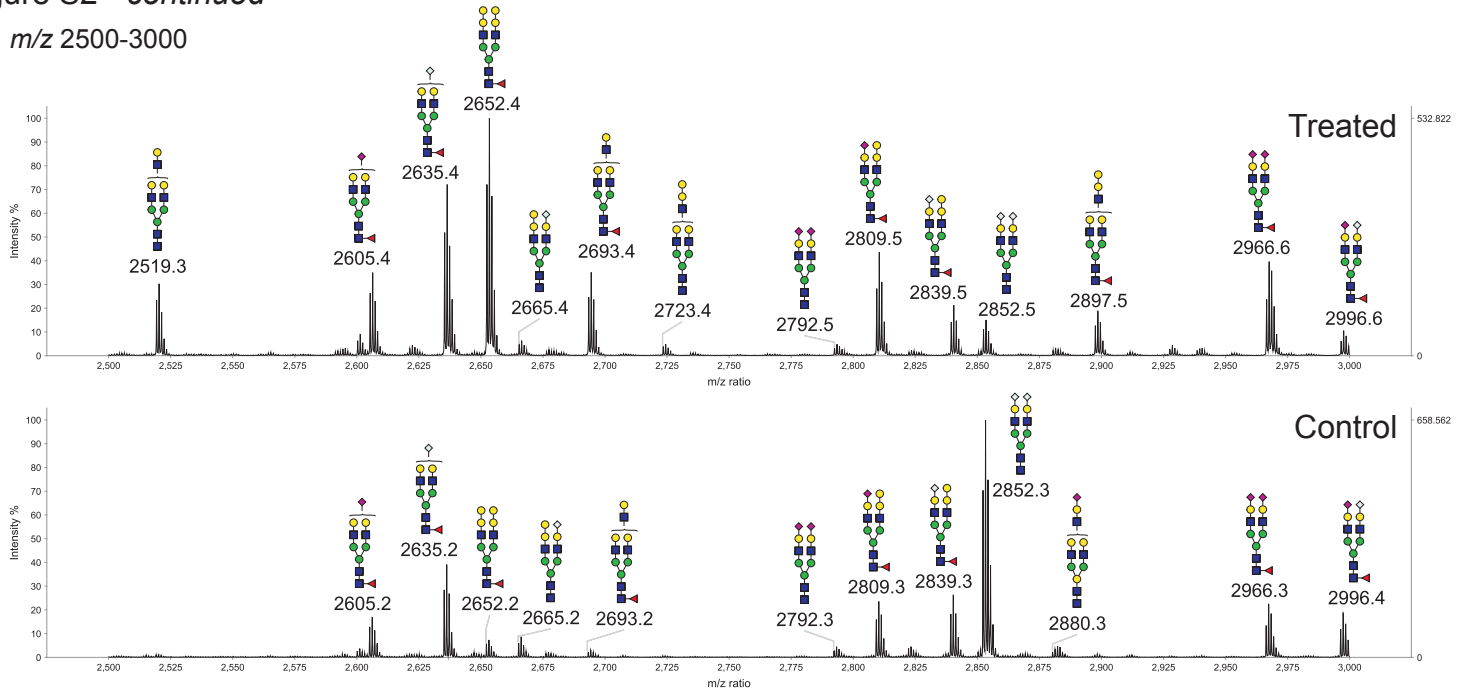

E  $m/z$  3000-3500

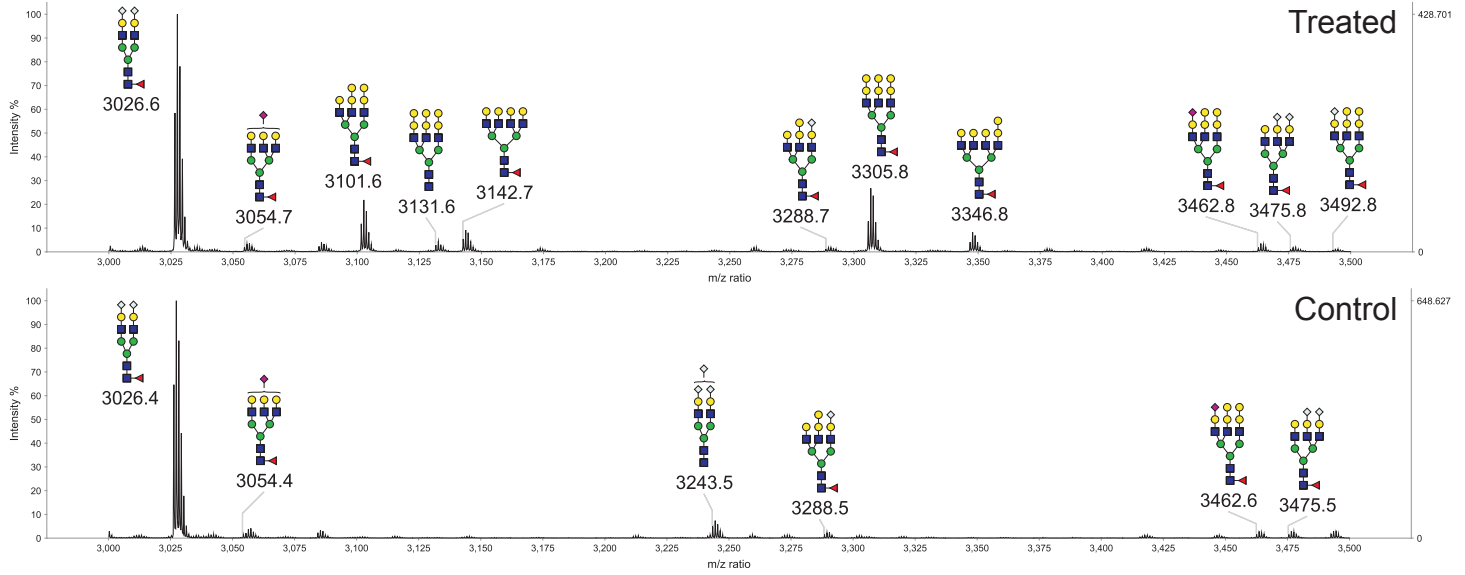

F  $m/z$  3500-4000

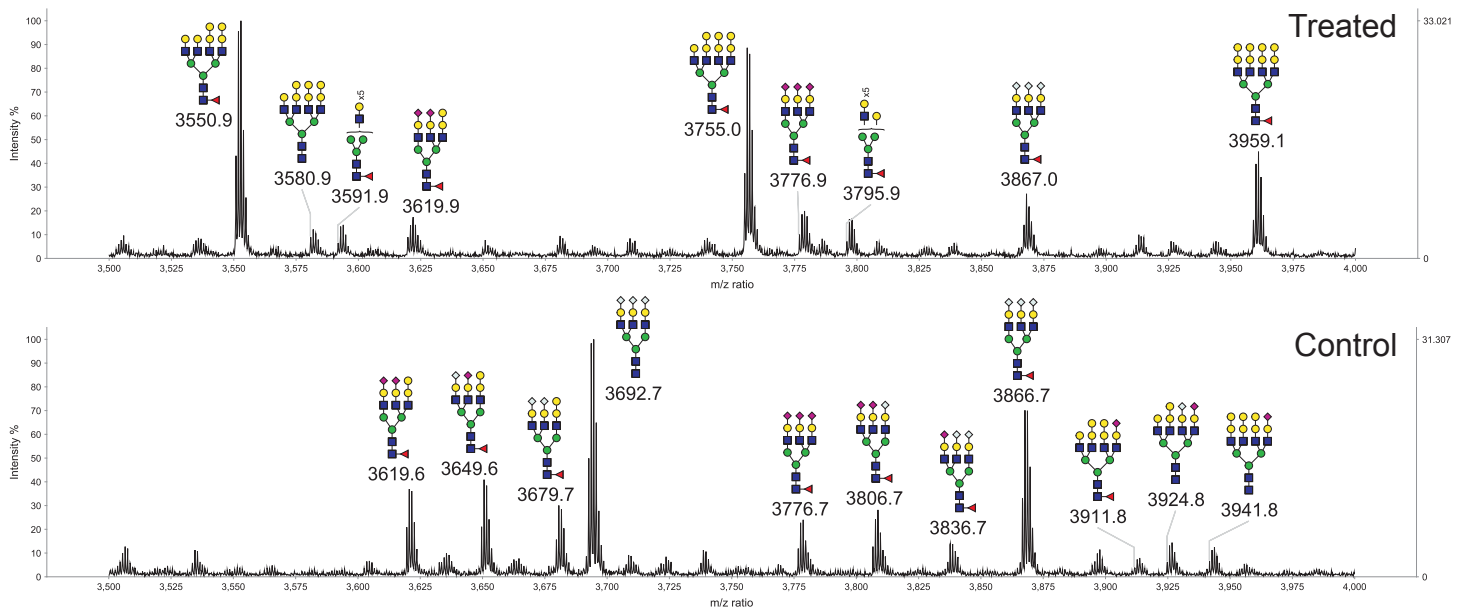

Figure S2 - continued

G  $m/z$  4000-4500

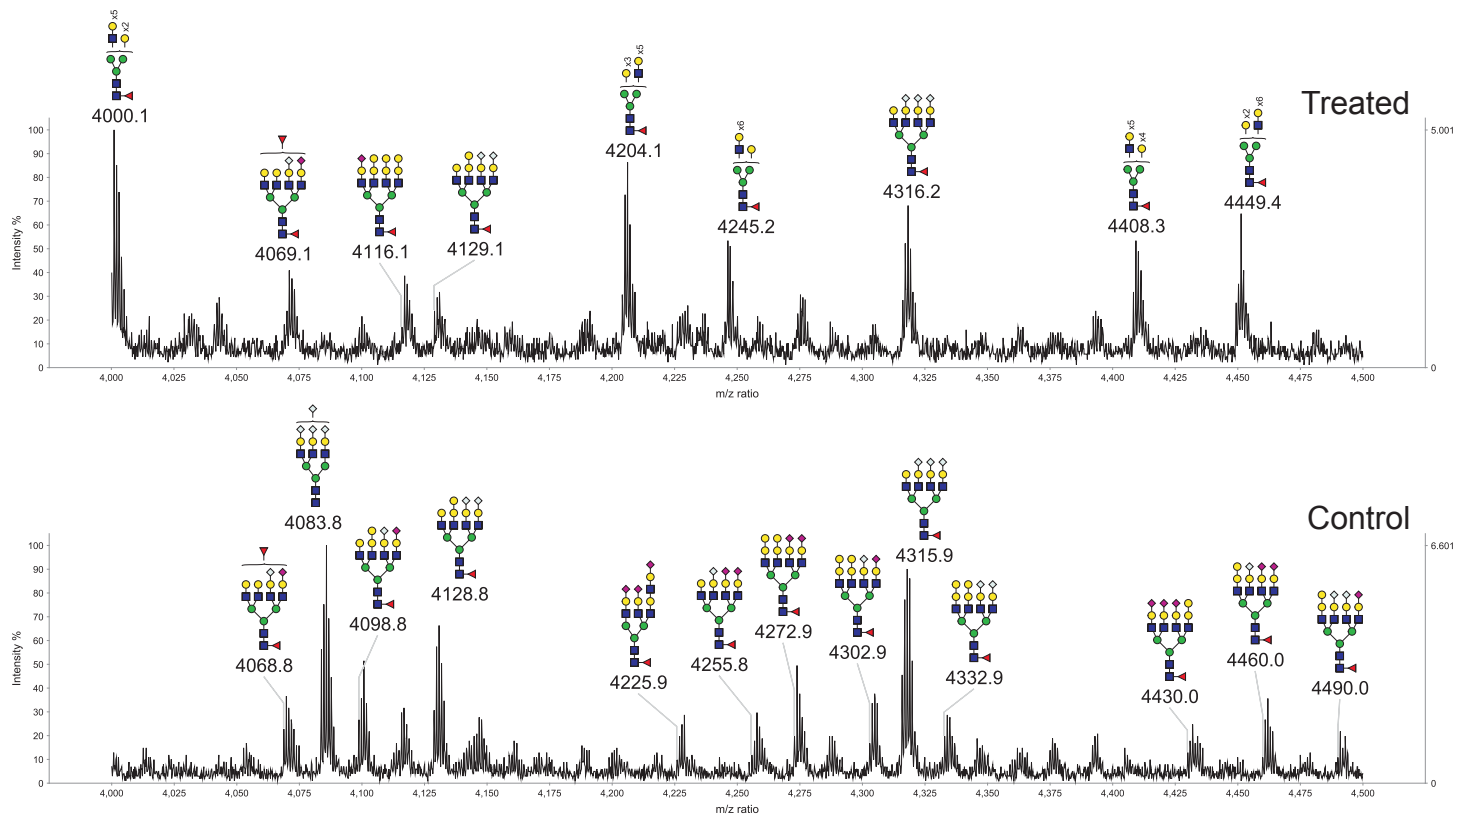

H  $m/z$  4500-5000

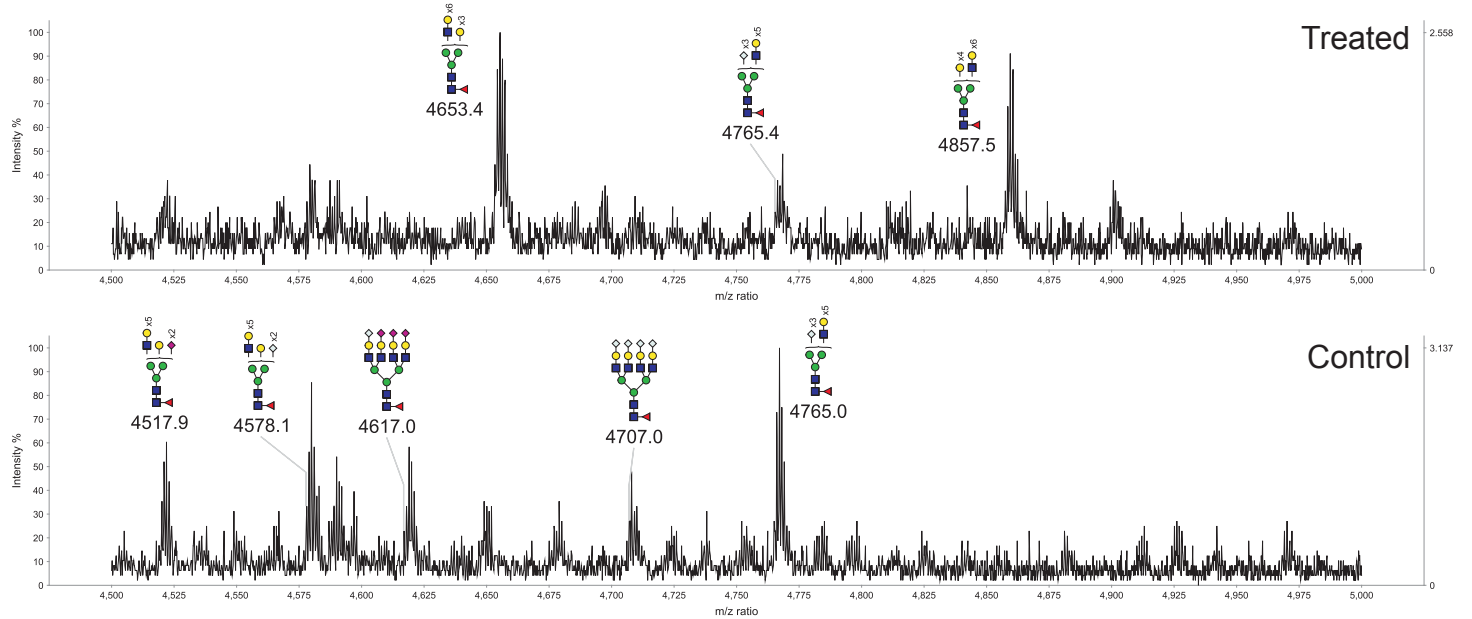



Figure S3

Testes

Key: ◀ Fucose ● Mannose ● Galactose ■ N-acetylglucosamine ◇ N-glycolylneuraminic acid ◆ N-acetylneuraminic acid

m/z 2500-3050

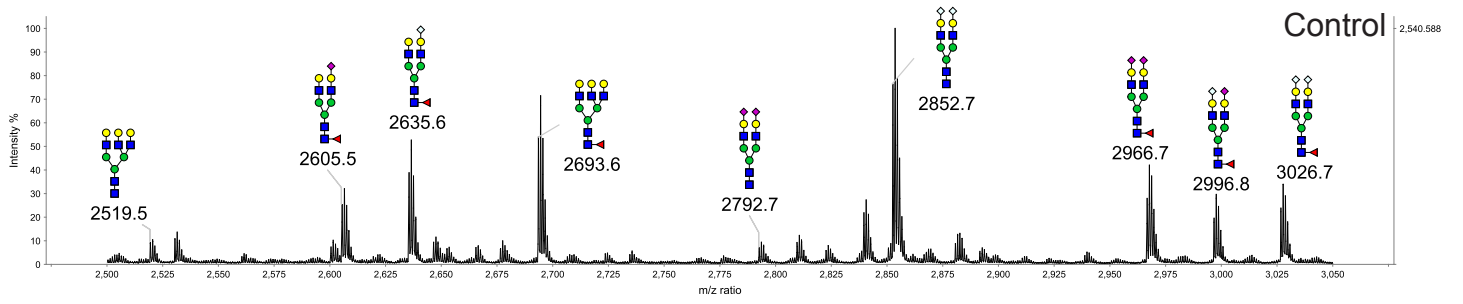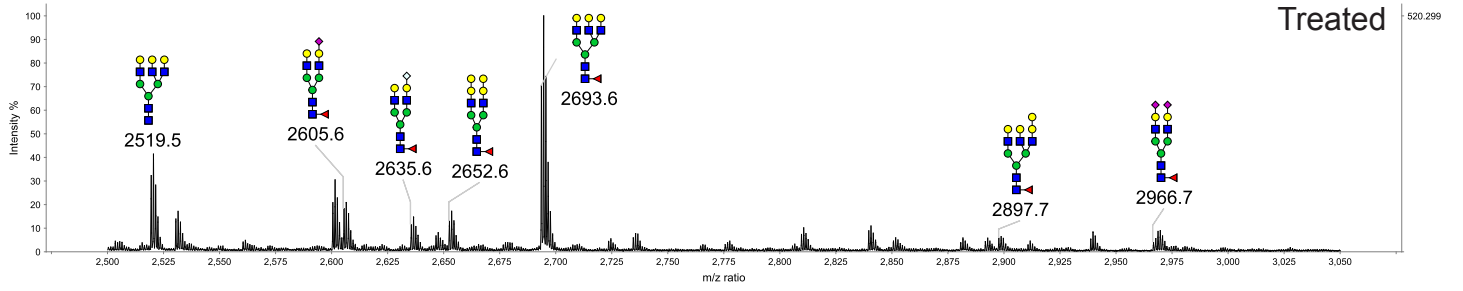

Figure S4

**Kidney**

Key: ◀ Fucose ● Mannose ● Galactose ■ N-acetylglucosamine ◇ N-glycolylneuraminic acid ◆ N-acetylneuraminic acid

**A** *m/z* 1000-1500

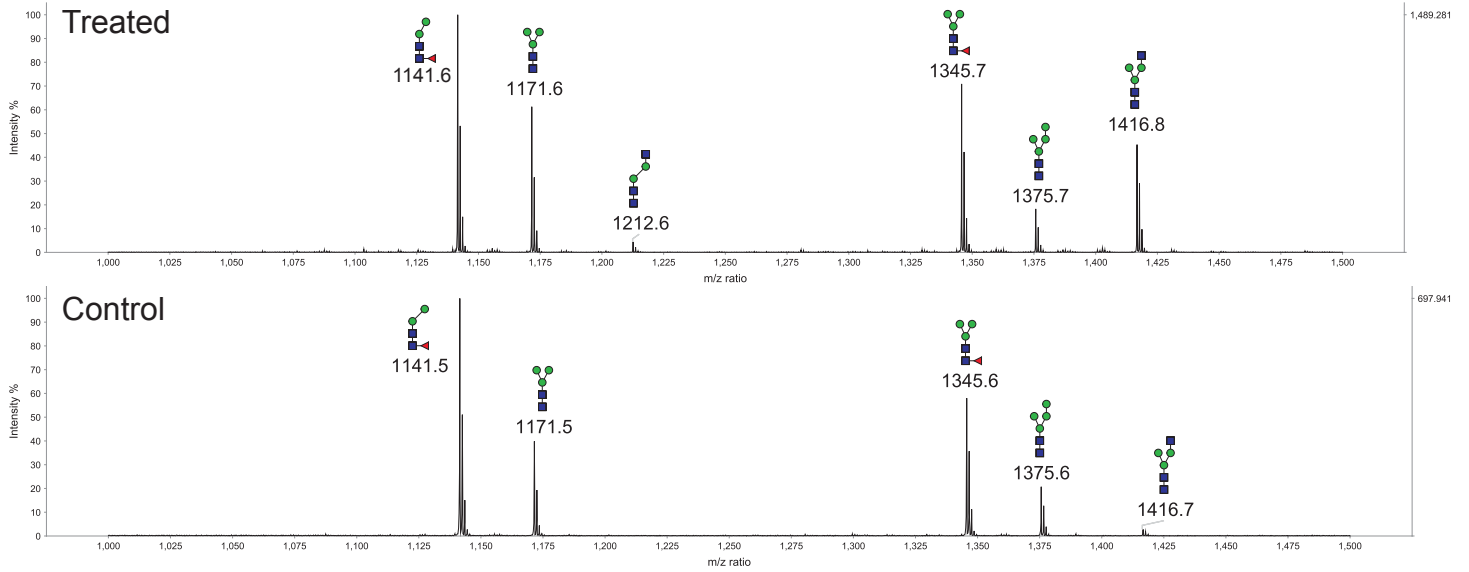

**B** *m/z* 1500-2000

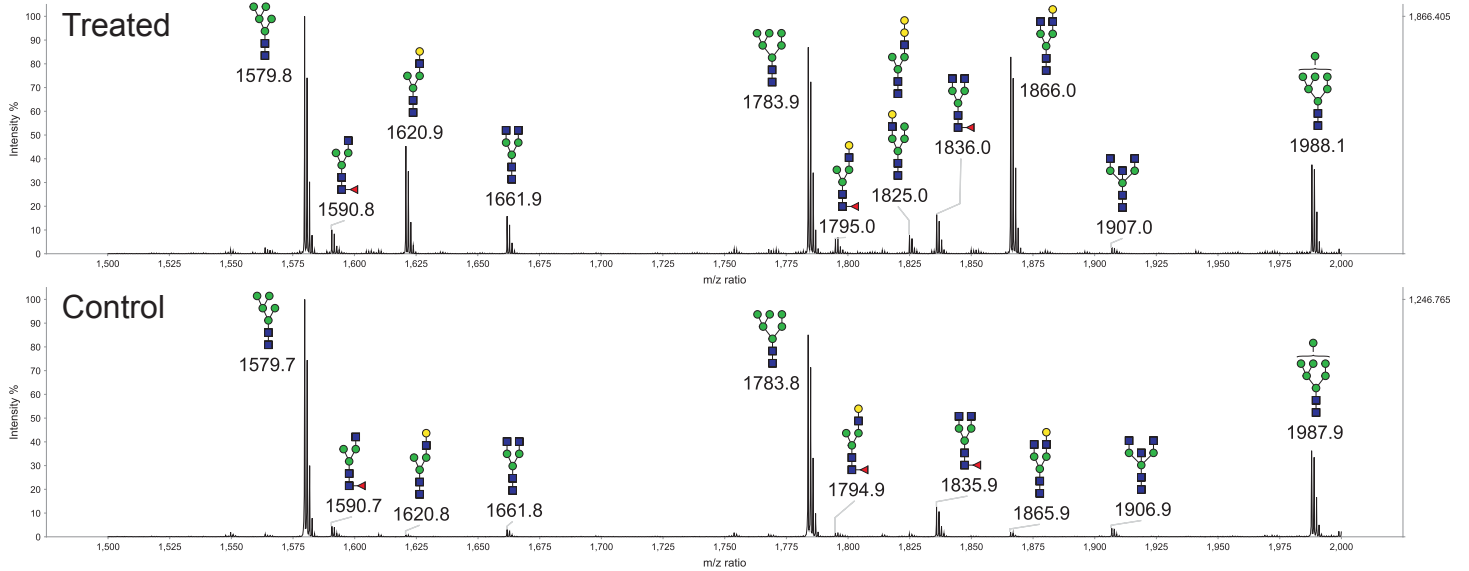

**C** *m/z* 2000-2500

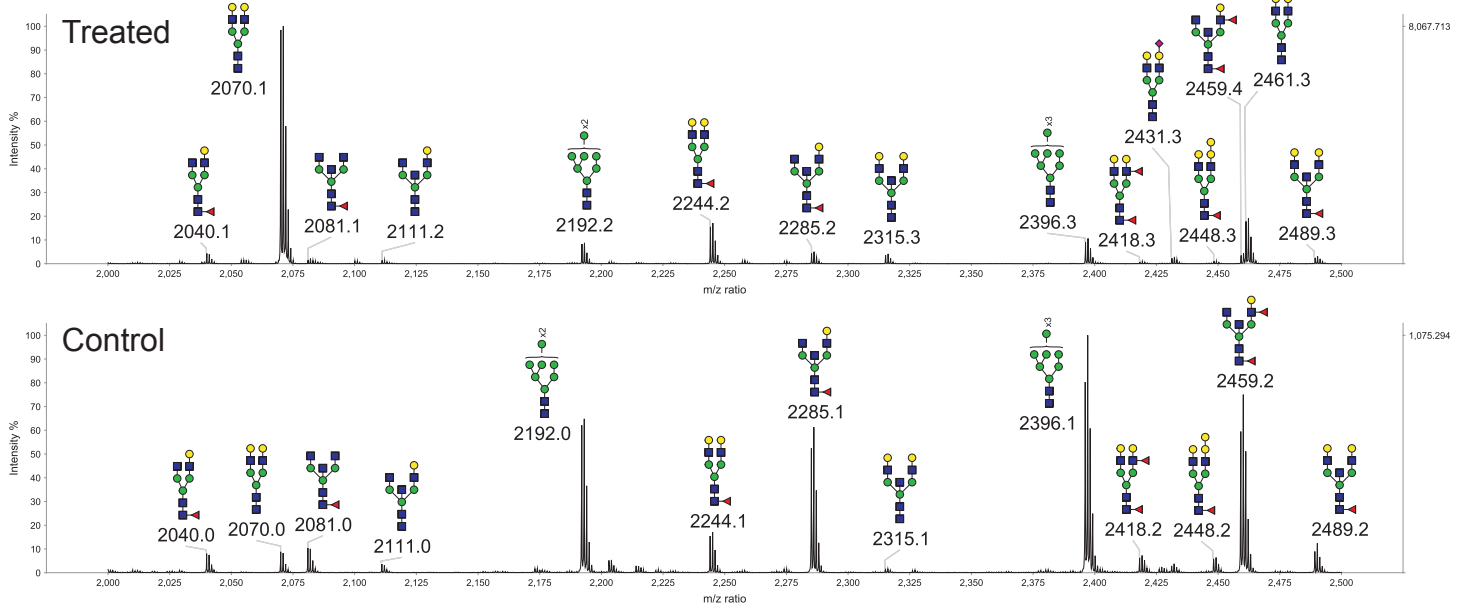

Figure S4 - continued

D  $m/z$  2500-3000

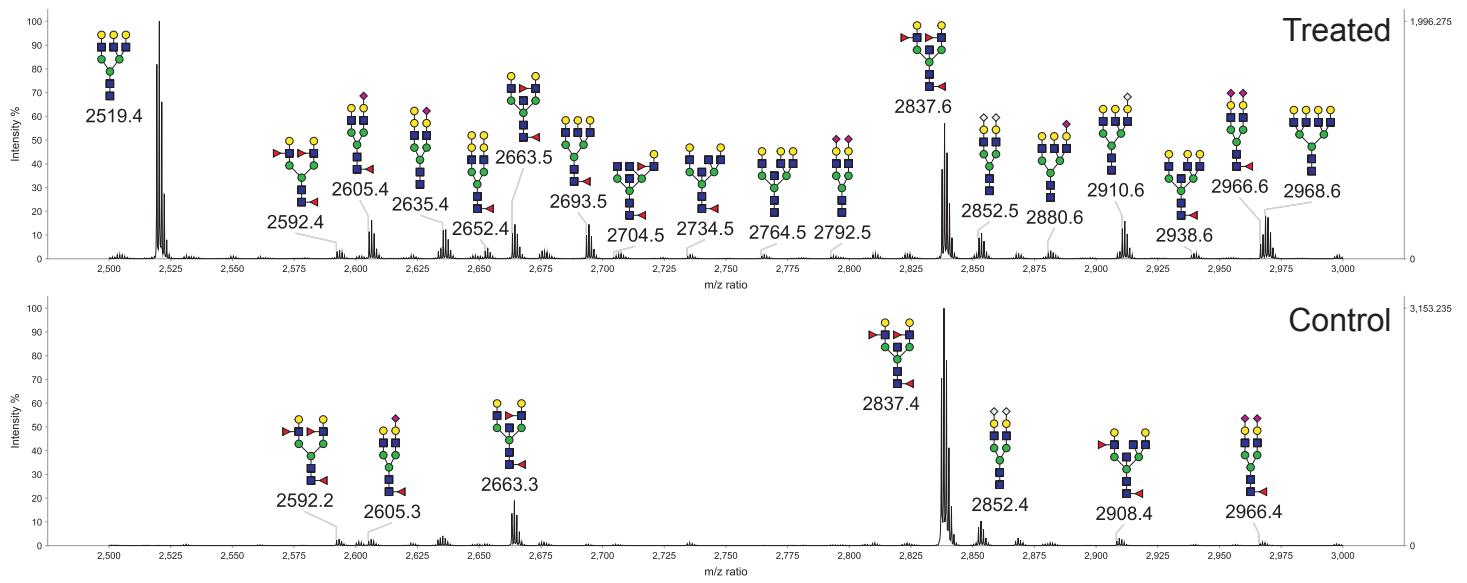

E  $m/z$  3000-3500

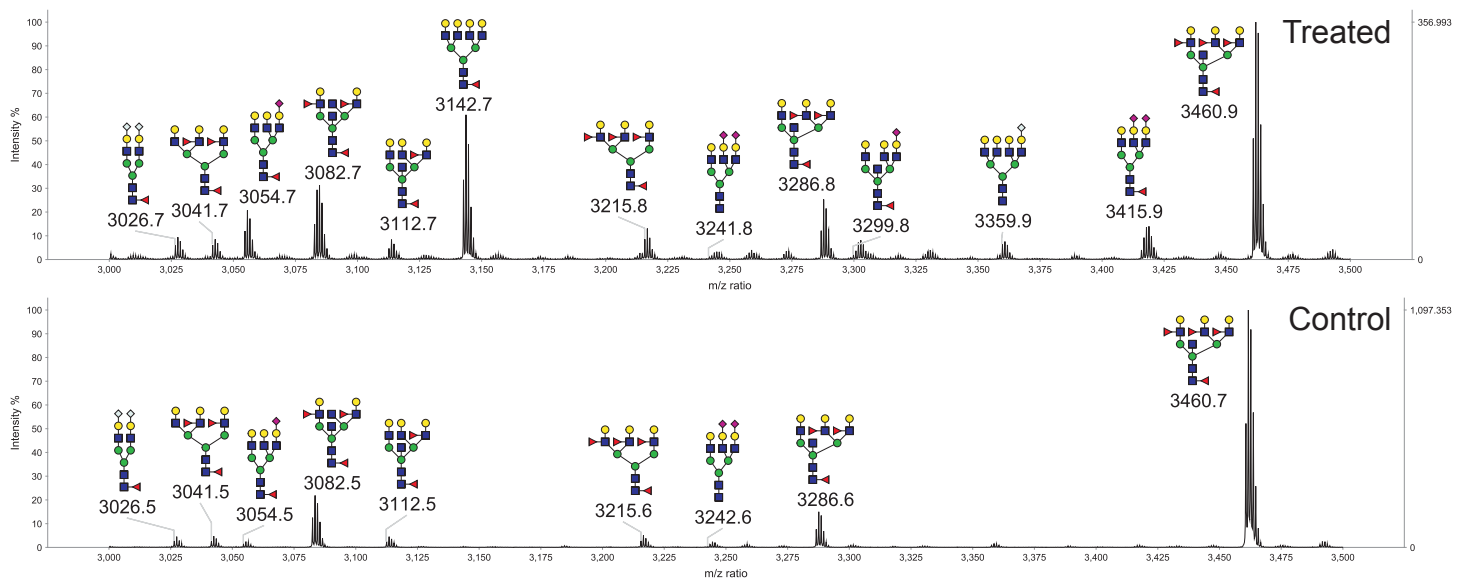

F  $m/z$  3500-4000

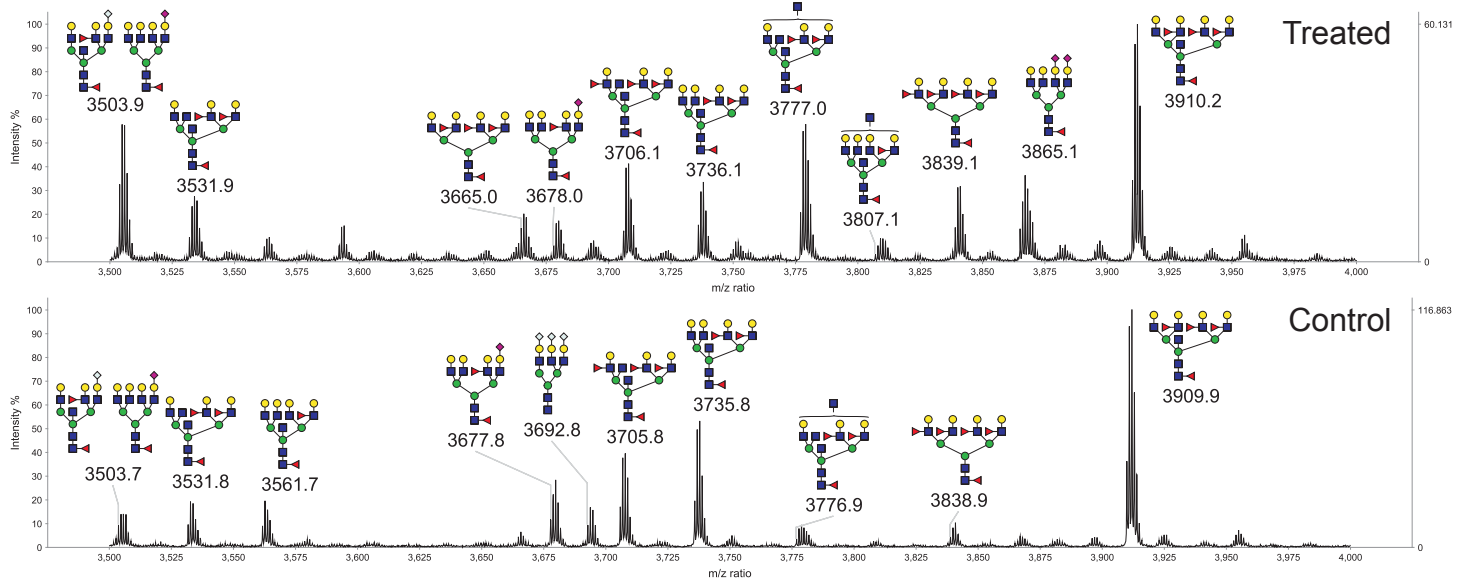

Figure S4 - continued

G *m/z* 4000-4500

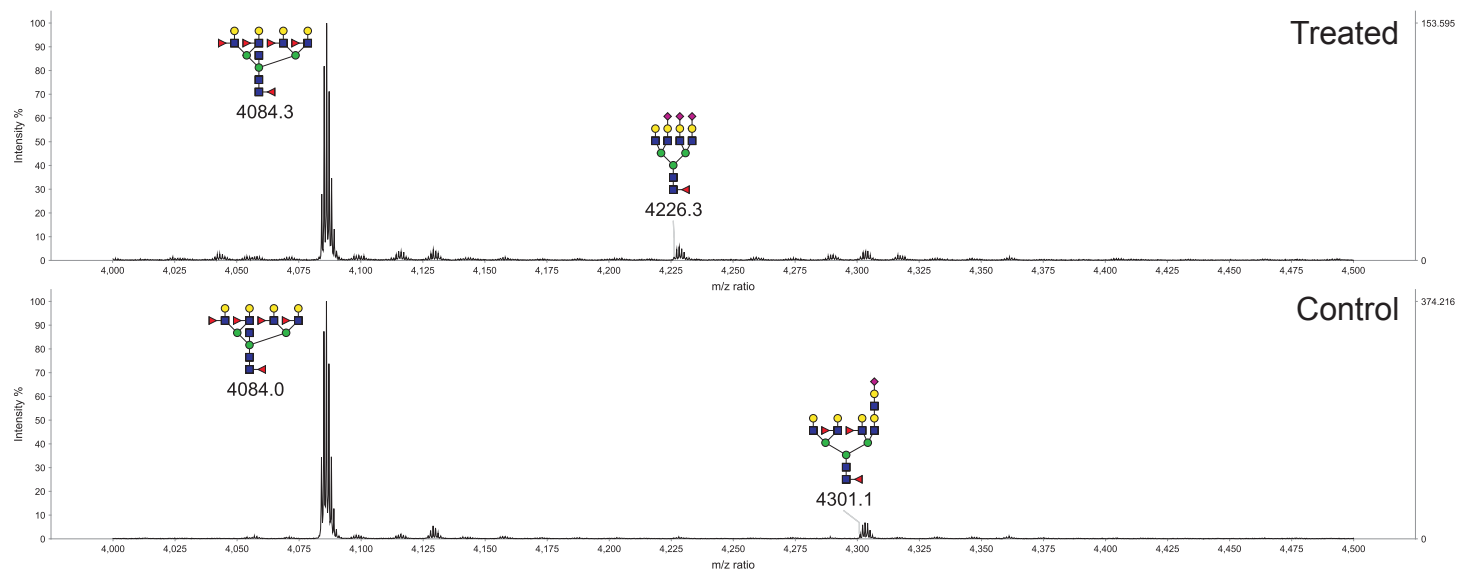

H *m/z* 4500-5000

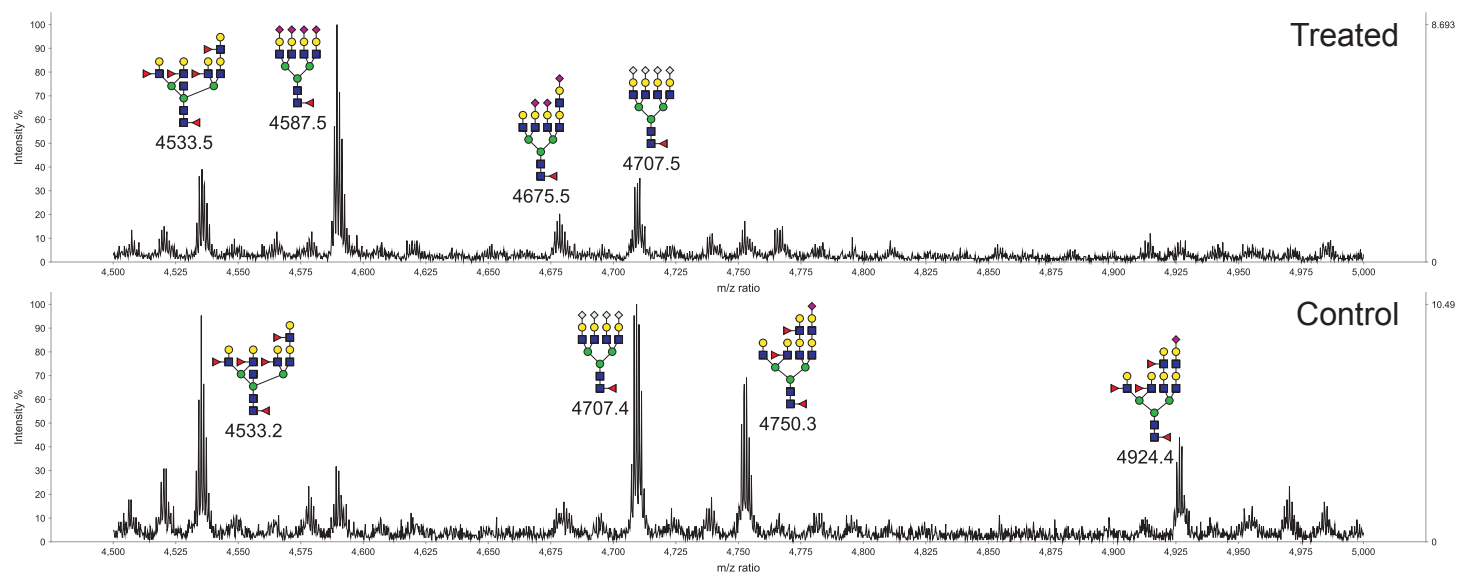

I *m/z* 500-1450

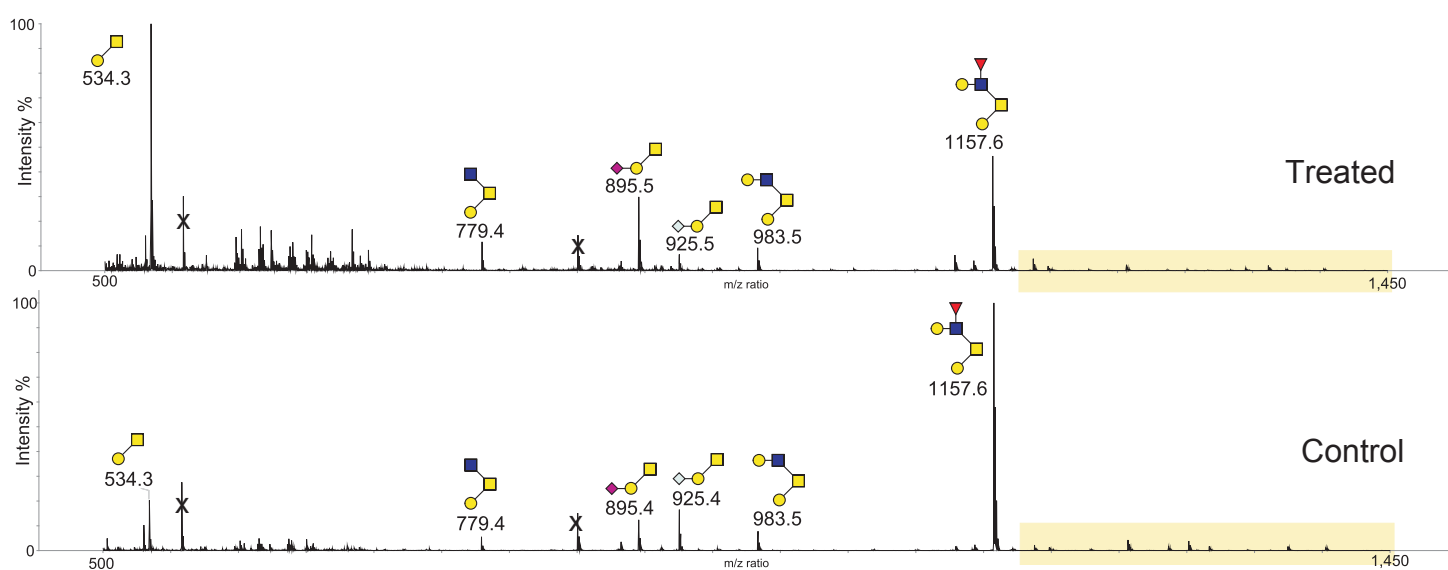

Figure S4 - continued

J  $m/z$  1170-1450

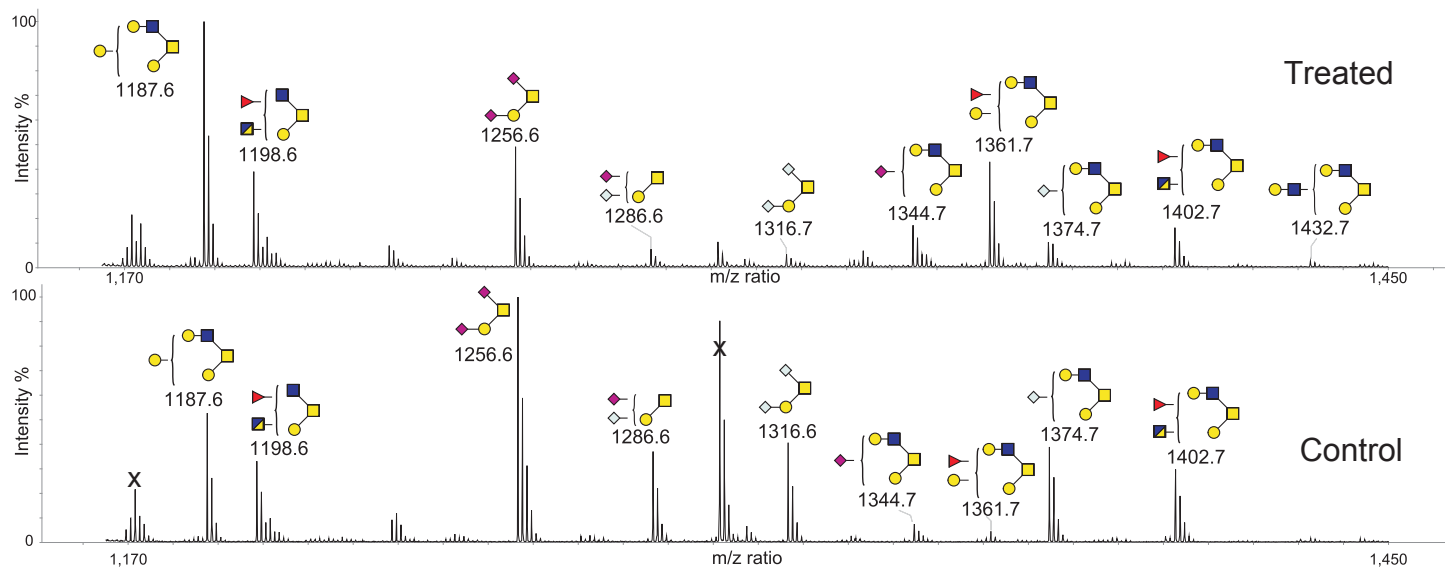

Supplement: supp_M114.606517_jbc.M114.606517-1.pdf [file supp_M114.606517_jbc.M114.606517-1.pdf]
